# Supplementary material for: Testing the 2020 European Seismic Hazard and Risk Models using data from the 2019 Le Teil (France) earthquake
Source: Copernicus journal article supplement (doi:10.5194/egusphere-2023-1740), 2023-07-28
Supplement: Supplementary file [file egusphere-2023-1740-AC1-supplement.pdf]

Konstantinos Trevelopoulos  
3 av. Claude-Guillemin  
BP 36009 - 45060 ORLÉANS Cedex 2  
France  
k.trevelopoulos@brgm.fr

Editor  
Natural Hazards and Earth System Sciences  
Copernicus Gesellschaft mbH  
Bahnhofsallee 1e  
37081 Göttingen  
Germany

Orléans, 17<sup>th</sup> of November 2023

Subject: Response to referee comments (manuscript: *egusphere-2023-1740*)

Dear Editors,

Please find attached a document containing our response to the referee comments with respect to our manuscript *egusphere-2023-1740* entitled “Testing the 2020 European Seismic Hazard and Risk Models using data from the 2019 Le Teil (France) earthquake”, by Konstantinos Trevelopoulos, Pierre Gehl, Caterina Negulescu, Helen Crowley, Laurentiu Danciu, as requested in the context of the review process. This document includes the referee comments followed by our responses in blue.

We would like to thank very much Dr. Cecilia I. Nievas and the Anonymous Referee. We appreciate very much the quality of their comments, the fact that they are constructive, and in general their effort to help us improve the quality of our manuscript. We have taken great care in the preparation of our responses and it has been a rewarding process. We are looking forward to your reply, and we hope it will be in favour of us revising the manuscript so that it may be considered for publication in *Natural Hazards and Earth System Sciences*.

Yours sincerely,

Konstantinos Trevelopoulos

## 7 **Reviewer 1**

---

8  
9 Review of Manuscript egusphere-2023-1740  
10 Testing the 2020 European Seismic Hazard and Risk Models using data from the 2019 Le  
11 Teil (France) earthquake  
12

13 This manuscript presents a comparison between building damage states as observed in the  
14 field after the 2019 Le Teil earthquake and those calculated by means of combining different  
15 components of existing risk models from different sources (not just the 2020 European  
16 Seismic Hazard and Risk Models). The damage survey has been processed by the authors  
17 according to expert judgment to obtain damage in terms of the EMS-98 scale. Different  
18 rupture models from the literature, as well as the USGS ShakeMap for this earthquake, are  
19 used to generate several realisations of ground motion fields in terms of peak ground and  
20 spectral acceleration (PGA, SA). The PGA values are then converted to macroseismic  
21 intensities using conversion equations, and these macroseismic intensities results are  
22 compared against the 7.5 value obtained in existing literature from field surveys with the  
23 purpose of selecting one rupture model to be used for the subsequent damage calculations  
24 carried out using the OpenQuake engine. Three main comparisons in terms of damage are  
25 carried out, combining different components (e.g., exposure, fragility, site effects) of different  
26 risk models as well as different risk calculation methods/software, and contrasting them  
27 against the results of the processed damage survey of the 2019 Le Teil earthquake.  
28

29 While the work presented in this manuscript is of interest to the research community to  
30 understand how different existing models and modelling choices affect the calculated  
31 damage and, most importantly, how the calculated damage compares against observations  
32 from a real earthquake, the manuscript has many significant shortcomings that would need to  
33 be addressed before it can be published in NHESS. I thus recommend that the manuscript  
34 be reconsidered for publication after major revisions.  
35

36 [We thank the reviewer for their constructive and helpful comments. We have tried to address  
37 them to the best of our knowledge, as detailed below.](#)  
38  
39

## 40 **Reviewer 1 - Main Comments**

41  
42 1. In my view, the title of the paper does not accurately describe its contents, due to three  
43 main reasons:  
44

45 1.I. The word “testing” is being used loosely throughout the manuscript (see point 2  
46 below).  
47

48 [We agree with your comment \(i.e., leaving the word “testing” to the context of actual  
49 statistical tests\), and we will revise the manuscript accordingly, by replacing the word  
50 “testing” by “comparison” or “evaluation” wherever it is applicable.](#)  
51

52  
53 1.II. The paper makes comparisons using a variety of sources of model components  
54 (exposure, fragility, ruptures) that are not just from the 2020 European Seismic Hazard

55 and Risk Models (ESHM20, ESRM20). The ground motion model used and labelled as  
56 being the ESHM20 one does not seem to be the model actually implemented in ESHM20  
57 but a previous version. When using the ESRM20 exposure model the building classes  
58 are “simplified”, effectively changing the ESRM20 exposure model. To my understanding  
59 (as such an outline is missing in the introduction), three comparisons in terms of damage  
60 are carried out:

61  
62 1.II.1) Section 3.3.1: Comparison between (a) damage calculated with the  
63 Armagedom software, using the vulnerability index approach, EMS-98 vulnerability  
64 classes, and an in-house exposure model, and (b) damage calculated with  
65 OpenQuake, using fragility models from the European Seismic Risk Model 2020  
66 (ESRM20) selected to be equivalent to the EMS-98 vulnerability classes, and the in-  
67 house exposure model converted onto ESRM20 building classes.

68  
69 1.II.2) Section 3.3.3: Comparison between (a) damage processed from the field  
70 survey, (b) damage calculated using the USGS ShakeMap, (c) damage calculated  
71 with OpenQuake, (seemingly) using the Kotha et al. (2020) GMPE (not the version  
72 used in ESHM20/ESRM20), and the BRGM VS30 model (which I infer is the ESRM20  
73 VS30 model derived from geology, not used in ESRM20), and (d) the same as (c) but  
74 using the ESRM20 VS30 model derived from topography (used in ESRM20 for  
75 cratonic and subduction areas, but not for shallow crustal areas, which is the case of  
76 France). All cases use the same exposure model, a building-by-building model based  
77 on the individual buildings from the damage survey to which ESRM20 building  
78 classes were assigned by the authors. All cases use the ESRM20 fragility models.

79  
80 1.II.3) Section 3.3.4: Comparison between (a) damage processed from the field  
81 survey and (b through g) six combinations of the following components:

82  
83 1.II.3.i. Exposure models: (i) the ESRM20 aggregated exposure model defined by  
84 administrative unit (one administrative unit), but with a large modification to the  
85 building classes that makes it different from the ESRM20 exposure model, and (ii)  
86 an in-house model derived from statistical data (8 or 9 centroids), to which  
87 ESRM20 building classes were assigned.

88  
89 1.II.3.ii. Site models: (i) the BRGM VS30 model (which I infer is the ESRM20  
90 VS30 model derived from geology, not used in ESRM20), values retrieved for the  
91 centroid of the administrative unit or 8-9 points of the exposure models, and (ii)  
92 the ESRM20 VS30 model derived from topography (used in ESRM20 for cratonic  
93 and subduction areas, but not for shallow crustal areas, which is the case of  
94 France), with the value for the ESRM20 exposure being a population-weighted  
95 average of the whole administrative unit and the values for the inhouse exposure  
96 model being retrieved from the 30 arc-sec cell that contains each of the 8- 9  
97 points.

98  
99 1.II.3.iii. Ground motions: (i) the USGS ShakeMap, and (ii) calculated with  
100 OpenQuake using the Kotha et al. (2020) GMPE (not the version used in  
101 ESHM20/ESRM20). As can be seen, no “pure” components of ESHM20/ESRM20  
102 appear to have been being used (“pure” = exactly as they have been used in the  
103 ESHM20/ESRM20 models) and several components from other sources are  
104 being used as well. The title should reflect that the models being compared come  
105 from a variety of sources and decisions from the authors.

106  
107 1.III. Finally, “testing [...] hazard and risk models” may be misleading, as it can be easily  
108 interpreted as testing the full probabilistic seismic hazard and risk models (i.e.,  
109 probabilities of exceedance of ground motion, average annual losses, etc.), which is not

110 what is done in the paper (and, furthermore, cannot be done using data from one single  
111 earthquake).

112  
113 To sum up, the paper shows comparisons (no statistical tests) of observed damage against  
114 damage calculated using components of risk models from different sources. I believe it is  
115 fundamental that a new title be assigned to the manuscript, taking into consideration the  
116 comments above.

117  
118 Indeed, there are no “pure” components of ESHM20/ESRM20 that have been used, and there  
119 are no statistical tests in the manuscript. We will revise it according to comments 1.1-1.III.

120  
121 We propose a new title for the manuscript:

122  
123 “Comparing components of the 2020 European Seismic Hazard and Risk Models using data  
124 from the 2019 Le Teil (France) earthquake”

125  
126  
127 2. I have found the word “testing” being used loosely throughout the manuscript as a  
128 synonym of “comparing”, “validating”, “verifying”, “carrying out quality assurance”, etc. The  
129 word “testing” usually implies a formal statistical procedure using statistical indicators of  
130 goodness of fit, similarity between distributions, etc., which are not what is presented in the  
131 paper. The paper mostly carries out comparisons, without quantifying differences across  
132 different models/components. Please avoid over-using and overstretching in meaning the  
133 word “testing”, rewording where necessary. Some outstanding examples:

134  
135 2.a. The title in itself. The European Seismic Hazard and Risk Models are probabilistic  
136 models. The paper uses some of their components to carry out ground motion and  
137 damage calculations that are compared against damage observations from one  
138 earthquake. One earthquake cannot test or validate a probabilistic model, only its  
139 components.

140  
141 2.b. Line 34: Bommer et al. (2013) call their work “quality assurance” and not “testing”.  
142 Throughout the paper they use the word “check” far more than they use the word “test”.

143  
144 2.c. Sections 3.1 and 3.2: These sections are not testing ground motions or  
145 macroseismic intensities, they are comparing ground motions and macroseismic  
146 intensities calculated with different rupture models (against one value of macroseismic  
147 intensity) with the purpose of selecting one rupture to use in the remaining comparisons  
148 of the paper. The PGA and SA values are not compared against instrumental  
149 measurements at all (values of PGA are mentioned in lines 64-66 but not marked on the  
150 plots or mentioned again in Section 3.1). The sections are presented as “tests” when, in  
151 reality, they are an intermediate comparative step to select rupture parameters.

152  
153 We agree with comments 2 and 2a-2c and we will revise the manuscript accordingly.  
154 Specifically, we will replace “testing” with terms such as “comparison” or “evaluation”, and “test”  
155 with “check” or “compare” or a comparable term.

156  
157 Moreover, the revised manuscript will state that the comparisons in Sections 3.1-3.2 serve the  
158 purpose of selecting rupture parameters.

159  
160  
161 3. In line with the first point above, and with the purpose of aiding the reader to navigate  
162 comparisons carried out across so many different options, please re-phrase the last  
163 paragraph of the introduction to describe more accurately the work contained in the paper:

164

165 3.a. Lines 46-47: This sentence states that the work is done “to test components of the  
166 ESHM20 and the ESRM20” models, giving the impression that only ESHM20 and  
167 ESRM20 components will be used, but components from other models are used as well,  
168 and these are not mentioned at all here. Please mention the other models used.

169  
170 3.b. Line 48: I suggest not using the expression “scenario simulations” to refer to ground  
171 motion scenarios calculated by means of ground motion models, as the word  
172 “simulations” is usually used to refer to physics-based ground motion simulations (this is  
173 not critical).

174  
175 The last paragraph of the introduction will be rephrased according to comments 3a-3b.

176  
177 Lines 46-47: “to compare components of the ESHM20 and the ESRM20 with local site  
178 effects models, exposure models and damage estimation methods,…”

179 We also plan to expand this paragraph by using the summary made by the Reviewer in  
180 Comment 1.

181  
182 Line 48: we replace “simulations’ by “computations”.

183  
184  
185 3.c. Lines 49-50: This sentence may give the impression that “the most compatible  
186 scenario simulation” is selected in terms of the one that gives the results closest to the  
187 USGS ShakeMap, but this is not what is stated in lines 50-52 or in Sections 3.1/3.2 (and  
188 further along in the paper), which show comparisons of all rupture models with respect to  
189 each other (including the USGS ShakeMap) and finally comparing intensities against the  
190 value reported by Schlupp et al. (2022).

191  
192 Actually, the so-called “USGS ShakeMap” is a shake-map generated by us, using our data  
193 (seismic stations measurements, site effect model, specific ground-motion model), with the  
194 USGS ShakeMap v4 code.

195  
196 In order to avoid any confusion, we will use the word “shake-map” (lower case) when it is  
197 our own product (although it has been generated using the USGS ShakeMap algorithm),  
198 as opposed to the wording “USGS ShakeMap” (trademark product downloaded from the  
199 USGS website). We will correct this sentence in order to clarify this.

200  
201 We will also add a table that summarizes all the shale-maps / ground-motion fields that  
202 have been generated:

| GM Map ID | Type                | GMM                             | Site model                    | Rupture model | Observations     |
|-----------|---------------------|---------------------------------|-------------------------------|---------------|------------------|
| GM1       | ground-motion field | KohtaEtAl2020Site               | BRGM soil classes to Vs30     | Ritz et al.   | No               |
| GM2       | ground-motion field | KohtaEtAl2020ESHM20SlopeGeology | Slope & Geology (ESRM20 data) | Ritz et al.   | No               |
| GM3       | ground-motion field | KohtaEtAl2020Site               | ESRM20 Vs30 data              | Ritz et al.   | No               |
| GM4       | shake-map           | KohtaEtAl2020Site               | BRGM Soil class to Vs30       | Ritz et al.   | Seismic stations |

204  
205  
206 3.d. Lines 49-52: The meaning of “the most compatible scenario simulation” and “the  
207 most plausible scenario simulation” is not clear. After reading the paper, I believe the

208 authors mean “the most compatible earthquake rupture”, or “the earthquake rupture that  
209 leads to the most compatible macroseismic intensities”.

210  
211 Thank you for suggesting a clear and precise term. We will use it to revise the manuscript  
212 according to comments 3c-3d.

213  
214  
215 3.e. Lines 46-54: While several sentences are dedicated to explaining the comparison of  
216 ground motions and macroseismic intensities (which is only a preliminary step to select a  
217 suitable rupture to carry out the damage comparisons), very little is said about the core of  
218 the work. Please consider delineating the content of the three damage comparisons in a  
219 similar fashion to what I have written above under point (1), or perhaps with a figure. This  
220 is relevant to help the user navigate the paper, as so many different  
221 considerations/decisions are being made in each case.

222  
223 Yes, we will do so based on your comments under point 1. We will also add a figure to  
224 summarize the various steps and comparisons.

225  
226  
227 4. The authors state (lines 113 and 315) that they are using the Kotha et al. (2020) ground  
228 motion prediction equation (GMPE) in the form of its KothaEtAl2020Site implementation in  
229 OpenQuake. However, all ESHM20/ESRM20 sources indicate that this is not the final GMPE  
230 used in ESHM20 and ESRM20. This being the case, the KothaEtAl2020Site GMPE should  
231 not be labelled as “ESHM20 GMF” (e.g., line 314), as this can be misleading for the reader.

232  
233 A more fundamental implication is that, with this GMPE being used, it is not the ESHM20  
234 ground motion model that is being “tested”, as implied in the title. Weatherill et al. (2020) and  
235 the ESHM20 report (Danciu et al., 2021) explain that a series of modifications were  
236 introduced to the Kotha et al. (2020) GMPE for the implementation in ESHM20 and ESRM20.  
237 Fundamentally, and given that the authors of the present manuscript emphasise the  
238 comparison of different VS30 models, KothaEtAl2020Site has a different amplification  
239 function for site effects, and the site-to-site variability of the GMPE was calibrated only on  
240 measured VS30, which means that an incompatibility arises when using it with inferred  
241 values of VS30. As explained in the OpenQuake documentation<sup>1</sup>:

242  
243 4.a. KothaEtAl2020Site is a “preliminary adaptation of the Kotha et al. (2020) GMPE  
244 using a polynomial site amplification function dependent on Vs30 (m/s)”.

245  
246 4.b. KothaEtAl2020ESHM20 is an “adaptation of the Kotha et al. (2020) GMPE for  
247 application to the 2020 European Seismic Hazard Model, as described in Weatherill et al.  
248 (2020)”. Page 89 of the ESHM20 report (Danciu et al., 2021) explains that  
249 KothaEtAl2020ESHM20 is the GMPE used in ESHM20. Site effects in this  
250 implementation depend on VS30 and whether that VS30 is a measured quantity or  
251 inferred from proxies (e.g., slope), so as to account for the uncertainty associated with  
252 using inferred values. Page 69 of Danciu et al. (2021) specifies that ESHM20 refers to  
253 ground motions on the “reference rock” (VS30 of 800 m/s everywhere). The ESHM20  
254 logic tree input file<sup>2</sup> also shows that KothaEtAl2020ESHM20 is being used for the  
255 calculations.

---

<sup>1</sup> <https://docs.openquake.org/oq-engine/master/reference/openquake.hazardlib.gsim.html#openquake.hazardlib.gsim>

<sup>2</sup> [https://gitlab.seismo.ethz.ch/efehr/eshm20/-/blob/master/oq\\_computational/oq\\_configuration\\_eshm20\\_v12e\\_region\\_main/gmpe\\_complete\\_logic\\_tree\\_5br.xml](https://gitlab.seismo.ethz.ch/efehr/eshm20/-/blob/master/oq_computational/oq_configuration_eshm20_v12e_region_main/gmpe_complete_logic_tree_5br.xml)

256  
257  
258  
259  
260  
261  
262  
263  
264  
265  
266  
267  
268  
269  
270  
271  
272  
273  
274  
275  
276  
277  
278  
279  
280  
281  
282  
283  
284  
285  
286  
287  
288  
289  
290  
291  
292  
293  
294  
295  
296  
297  
298  
299  
300  
301  
302  
303  
304  
305

4.c. KothaEtAl2020ESHM20SlopeGeology is an “adaptation of the ESHM20- implemented Kotha et al. (2020) model for use when defining site amplification based on slope and geology rather than inferred/measured Vs30”. The ESRM20 logic tree input file<sup>3</sup> and its “cut” version used for shallowcrustal areas when comparing against past earthquakes<sup>4</sup> indicate that this is the GMPE used in ESRM20 to calculate losses. Site effects in this implementation depend on slope and geology, not VS30 (e.g., second paragraph of Section 3.2 of the ESRM20 report, page 16). ESRM20 uses this model together with the slope and geology of the ESRM20 model, which can be retrieved with the “exposure-to-site” tools cited in the present manuscript.

As a consequence, reference to the KothaEtAl2020Site GMPE should be modified so that it is not named as “the ESHM20 GMPE” or “the ESRM20 GMPE”. Alternatively, the analyses could be re-done using the KothaEtAl2020ESHM20SlopeGeology GMPE and associated ESRM20 site model (slope and geology, not VS30), as in ESRM20. One should also note that using KothaEtAl2020ESHM20 with VS30 values other than 800 m/s would not necessarily be representative of either the ESHM20 or ESRM20 models.

In the revised manuscript, we will now apply the correct KothaEtAl2020ESHM20SlopeGeology GMM when applying the “ESHM20 model”, according to Comment 4. However, we will also apply the KothaEtAl2020Site when using the Vs30-based site effect model available at BRGM. These differences will be detailed in the Table above (answer to Comment 3).

As far as Comment 4.c is concerned, the ESRM20 uses a collapsed version of the ESHM20 source model logic tree for 2 reasons: 1) to avoid high computational costs for calculations with respect to the generation of stochastic event sets and the associated ground motion fields, 2) to avoid undesirable correlations in the source parameters due to the approach for propagating uncertainty, which assigns to all sources the same category of activity rate. In our manuscript, we are assessing damage after a single event. Therefore, no source logic tree is used.

5. Associated with the previous point, I believe it is very important that clarity is added with respect to the site models used in the comparisons. When comparing against Weatherill et al. (2023) (cited by the authors) and the ESHRM20 documentation, the explanations (e.g., lines 266-272) in the paper lack from some clarity:

5.a. It is not fully clear what the “BRGM’s VS30 database” refers to, as there are two VS30 models in the cited reference Weatherill et al. (2023): one based on topography alone, and another based on geology alone. The ESRM20 exposure-to-site tools (which the authors use and cite in the present manuscript) return the VS30 values from the topography-based model, as the comparisons in Weatherill et al. (2023) showed that it performed better than the geology-based one. As Table 3-5 (line 310) shows different VS30 values for the two (and quite round values for the BRGM case), I infer that the “BRGM’s VS30 database” refers to the geology-based VS30 model presented in Weatherill et al. (2023). Please clarify in the manuscript.

We apologize that there has been a confusion regarding the reference and origin of the “BRGM’s VS30 database”. The model that we used in the manuscript is an EC8 soil class map assembled at BRGM for the French territory: this map of soil classes has then been

---

<sup>3</sup> [https://gitlab.seismo.ethz.ch/efehr/esrm20/-/blob/main/Hazard/gmpe\\_logic\\_tree\\_5br\\_slope\\_geology.xml](https://gitlab.seismo.ethz.ch/efehr/esrm20/-/blob/main/Hazard/gmpe_logic_tree_5br_slope_geology.xml)  
<sup>4</sup> [https://gitlab.seismo.ethz.ch/efehr/esrm20\\_scenario\\_tests/-/blob/main/models/esrm20/GMPE/gmpe\\_logic\\_tree\\_5br\\_shallow\\_default.xml](https://gitlab.seismo.ethz.ch/efehr/esrm20_scenario_tests/-/blob/main/models/esrm20/GMPE/gmpe_logic_tree_5br_shallow_default.xml)

306 converted into a Vs30 map by taking the median value of each EC8 soil class. The  
307 associated reference is a BRGM report (Roullé & Monfort, 2016), where the map is based  
308 on local knowledge of geology and soil classes. It is not linked to the Weatherill et al. (2023)  
309 reference. We will add some sentences to clarify this aspect.

310 Associated reference:

311 Monfort, C., & Roullé, A. (2016). Estimation statistique de la répartition des classes de sol  
312 Eurocode 8 sur le territoire français - Phase 1 : Rapport final. BRGM Report RP-66250-  
313 FR.

314  
315  
316 5.b. The manuscript would benefit from adding some sentences regarding the resolution  
317 of each of the two models, as this is relevant for the reader to understand what is being  
318 compared (e.g., in lines 267- 272). From Fig. 7 of Weatherill et al. (2023) it looks like in  
319 the “BRGM’s VS30 database” there are three geologic units, associated with three  
320 ranges of VS30 values (is the uncertainty being sampled to assign values in the paper?).  
321 The “point” workflow of the ESRM20 exposure-to-site tool returns the values associated  
322 with the 30-arcsec cell to which the target point belongs, as 30-arcsec is the resolution of  
323 the model.

324  
325 The resolution of the BRGM Vs30 model is based on a geological map at the (1/50000  
326 scale). We will add a sentence comparing this value to the resolution of the ESRM20  
327 exposure-to-site tool (30-arcsec).

328  
329 5.c. It is noted that the VS30 values returned by the exposure-to-site tool are not used in  
330 ESRM20 in France (non-cratonic shallow seismicity). These VS30 values are used with  
331 the craton and subduction GMPEs selected for the areas of Europe where the shallow-  
332 crustal ESHM20 GMPE (i.e., KothaEtAl2020ESHM20SlopeGeology) is not applicable  
333 (e.g., see page 16 of the ESRM20 report, Crowley et al., 2021). The GMPE used for  
334 ESRM20 (i.e., KothaEtAl2020ESHM20SlopeGeology in OpenQuake) calculates site  
335 amplification based on slope and geology directly, not VS30. Please clarify in the  
336 manuscript that the VS30 values labelled as ESHM20 are actually not used in  
337 ESHM20/ESRM20 in France.

338  
339 We agree with this comment: as stated above, we will now use the  
340 KothaEtAl2020ESHM20SlopeGeology GMM to represent the “ESHM20 model” (GM2 in  
341 the above table). As a result, we will use the ESRM20 slope and geology data directly.  
342 For the generation of other ground-motion scenarios, we will still use the BRGM Vs30  
343 model for France associated with the KothaEtAl2020Site GMM in order to be consistent.  
344 We will clarify this in the revised manuscript.

345  
346 d. From my understanding, the site amplification model and VS30 maps are part of  
347 ESRM20 and not ESHM20, as ESHM20 focused on hazard on the reference rock.  
348 Please name them as ESRM20, not ESHM20.

349  
350 We will rename them accordingly in the revised manuscript.

351  
352  
353 6. In my view, it is necessary to add a map that shows the resolution/locations of the different  
354 exposure models and site models, the spatial extent of the municipality of Le Teil, the  
355 location of the selected rupture plane, etc. This is important for the reader to be able to  
356 understand the different models that are being compared and interpret the differences  
357 observed.

358  
359 Thank you for suggesting this. Such maps will be added to the revised manuscript.  
360



361  
362 7.a The conclusions section is too short and does not discuss the results with depth. It only  
363 focuses on marginal observations. It consists of three paragraphs, the first (and longest) of  
364 which focuses extensively on the comparison of macroseismic intensities (which is not the  
365 core of this work), the second of which briefly mentions that the exposure model was a key  
366 difference-maker in the results, without elaborating on reasons, and the third paragraph  
367 discusses potential improvements to the analysis by changing the criteria used to post-  
368 process the field damage survey, highlights the need for more standardised field survey  
369 practices, and comments about the importance of accounting for buildings not included in the  
370 survey, which has not been discussed in the paper and for which explanations are not given.  
371 Please rewrite the conclusions focusing on the large number of different model components  
372 that have been compared, to reflect the work done.

373  
374 The conclusions will be revised based on this comment. Thank you for your comment and your  
375 guidance. The points around which the conclusions will be revised:

- 376  
377 - The comparison of macroseismic intensities, as well as the other comparisons will be  
378 discussed in the conclusions;  
379 - The effect of the exposure model on the results will be discussed in terms of the number of  
380 estimated damages, and in terms of the included building classes and their fragility;  
381 - The effect of accounting for buildings not included in the survey will be discussed in the  
382 manuscript and in the conclusions.  
383

384  
385 7.b I have found the statement about the effect of the exposure model (lines 359-362) quite  
386 hard to see in Fig. 5, which shows so many different models. Moreover, lines 323-333 focus  
387 on the differences due to the VS30 model, not the exposure. I strongly recommend to find  
388 alternative ways to show and compare these results (perhaps several plots "grouping" results  
389 according to exposure, or VS30), and potentially even to quantify the differences between  
390 models, so that it becomes clearer to the reader whether exposure or site effects have had a  
391 greater influence in the discrepancies with observed values.

392  
393 Once more we would like to thank you for your comment and your guidance. In the revised  
394 manuscript, we will describe the effect of the different exposure models in Section 3.3.4. We  
395 will add different plots, which will group results by exposure or Vs30. Moreover, the differences  
396 between models will be quantified by selecting one case as the reference, and by subsequently  
397 calculating the ratio of the probability of a damage grade in the other cases to the probability  
398 of a damage grade in the reference case.  
399

400  
401 7.c The importance of including in the calculations buildings that were not part of the damage  
402 survey is mentioned in the conclusions (lines 368-369), but I cannot find it discussed before.  
403 Please explain why it is important to include those buildings and comment on why the  
404 damage survey seems to cover such a small proportion of the buildings of the municipality of  
405 Le Teil. Did they only survey buildings on demand from the owner? Can it be assumed that  
406 the rest of the buildings were undamaged? This is important as well to interpret the plots in  
407 Fig. 5.

408  
409 Indeed, surveys were done upon request from the owner: therefore there is a potential bias to  
410 account of in that damage distribution. On the other hand, it cannot be guaranteed that the rest  
411 of the buildings were undamaged. This issue will be discussed in the revised manuscript.  
412 Thank you very much for raising this point.  
413

414 We propose to add a table that will clarify the way the buildings have been surveyed:  
415

| Observed Damage Data ID | Exposure resolution                           | Exposure data                           | Damage estimation method                                                               | Damage conversion method                                                                                                                  |                   |
|-------------------------|-----------------------------------------------|-----------------------------------------|----------------------------------------------------------------------------------------|-------------------------------------------------------------------------------------------------------------------------------------------|-------------------|
| DD1                     | Building-by-building (327 buildings)          | AFPS emergency survey                   | AFPS emergency observations on 327 buildings (Green/Yellow/Red tags)                   | Conversion to EMS-98 damage grades (Tab. 2.1)                                                                                             | Related to Fig. 4 |
| DD2                     | Infra-municipality districts (2778 buildings) | National statistics database (BRGM-CCR) | AFPS emergency observations on 327 buildings (Green/Yellow/Red tags) + "Extrapolation" | Conversion to EMS-98 damage grades with expert judgment (Tab. 3.6)                                                                        | Related to Fig. 5 |
| DD3                     | Infra-municipality districts (2778 buildings) | National statistics database (BRGM-CCR) | AFPS emergency observations on 327 buildings (Green/Yellow/Red tags) + "Extrapolation" | Conversion to EMS-98 damage grades (Tab. 2.1) + Bias adjustment on total number of 2778 buildings (accounting for non-surveyed buildings) | Related to Fig. 5 |

416  
417  
418  
419  
420  
421  
422  
423  
424  
425  
426  
427  
428  
429  
430  
431  
432  
433  
434  
435  
436  
437  
438  
439

Apart from this, the first paragraph (lines 350-357) talks extensively about macroseismic intensities calculated with the AS2000 model. The acronym AS2000 is not defined at all within the text. Line 354 suggests the AS2000 has been used to convert from SA(1 s) to macroseismic intensity, and , lines 355- 357 highlight that SA(1 s) is not representative of the buildings in Le Teil, but Section 3.2 discusses two models that convert from PGA/PGV (not SA) to macroseismic intensity. I thus infer AS2000 stands for Atkinson and Sonley (2000), one of the conversion models used by the Armagedom software, according to Sedan et al. (2013). However, no macroseismic intensity values calculated using the Atkinson and Sonley (2000) conversion equation are presented in the paper. Please revise and correct as needed.

We apologize for this confusion: the reference to the Atkinson & Sonley (2000) GMICE comes from a previous working version of the manuscript. Eventually, this GMICE has not been used in the intensity computations (we confirm that the SA(1s) ground-motion parameter is of little interest to the studied building stock). The manuscript will be corrected by removing references to this model.

8. Similarly to the conclusions, the abstract would need a revision to include mention of all other models that have been used, as per my previous comments. Please revise the last sentence of the abstract (lines 17-19), which vaguely hints on conclusions that do not match the conclusions section or the content of the work.

440 The abstract will be revised so that it takes into account your comments, and the closing  
441 statements will match the content. Thank you for this comment.  
442

## Reviewer 1 - Other Comments on Content

1. Line 56: Please remove “and risk” from the title, as the section does not describe seismic risk in the area.

This will be removed from the title. Thank you for this comment.

2. Lines 70-74: While this statement can be generally valid, it is noted that the ground motion model used in ESHM20 is a backbone model whose central tendency is derived from European data that may be lacking representation of such shallow earthquakes with a relatively large stress drop, but whose different branches account for the possibility of having more “unusual” stress parameters (i.e., uncertainty in the stress drop is treated as an epistemic uncertainty). Please see Kotha et al. (2020) and Weatherill et al. (2020) and consider rephrasing (otherwise it suggests that the authors agree with Causse et al. 2021 in this particular case and believe a priori that the ESHM20 ground motion model cannot be able to represent this earthquake).

The manuscript will be revised according to this comment. We do not wish to express any agreement or disagreement with Causse et al. (2021), only to report their findings. However, we do acknowledge –and the revised manuscript will do so too– that the ESHM20 ground motion model may be able to represent the ground shaking generated by this earthquake. We propose to add the following sentence at the end of the paragraph:

“However, it should be noted that some branches in the ESHM20 GMM logic tree should be able to account for the possibility of having extreme stress parameter values, by treating uncertainty in the stress drop as a source of epistemic uncertainty (Kotha et al., 2020; Weatherill et al., 2020).”

3. Line 101, Table 2-1: There are some aspects of the table that would benefit from clarification in the text:

3.a. How should the reader interpret the first four columns that contain “R” and empty spaces? Does it mean that while a certain parameter is red, the EMS-98 damage grade is as indicated, irrespective of the other parameters? Are the four components ordered as per a hierarchy? I.e. if both vertical and horizontal structural elements are red, then it is damage grade 5, but if the horizontal structural elements are red and the vertical ones are yellow or green, then it is 4?

Yes, in the cases where a given parameter is red the damage grade is assigned irrespective of the other parameters.

Yes, the four components are ordered hierarchically. Yes, if both vertical and horizontal structural elements are red, then the damage grade 5 is assigned, but if the horizontal structural elements are red and the vertical are yellow or green, then the grade 4 is assigned.

We will add this clarification in the revised manuscript.

3.b. The far right column shows all components in green and the damage grade resulting in 1. Is this because all entries in the survey have some sort of damage and thus “green” is to be interpreted as “damaged, but usable” and not include “undamaged”? It calls the

497 reader's attention that everything is green and the damage grade is not zero. Please  
498 comment in the paper.  
499

500 Indeed, in the cases where everything is green, the damage grade 1 is assigned (damage  
501 grade 1 corresponds to no structural damage and slight non-structural damage). This  
502 assignment is done based on our judgement. The dataset that we used contains only  
503 damage observations, which were made during inspections on request by the building  
504 owners. We consider that slight non-structural damage was the cause that led the owners  
505 to request an inspection of their building. We will add this clarification in the revised  
506 manuscript.

507  
508

509 4. Line 106, Table 2-2:

510  
511

511 4.a. In the caption, please clarify this is the buildings' "final" tag (as opposed of tags by  
512 components). "... as a function of the buildings' final tags for the entire dataset".  
513

514  
515

514 This will be corrected in the revised manuscript. Thank you for this comment.

516  
517

517 4.b. It calls my attention that several green buildings end up classified as ESM-98  
518 damage grade 3, which corresponds to moderate structural damage and heavy non-  
519 structural damage. I would expect moderate structural damage to lead to the need of  
520 further inspection and repair before the building can be used, while "green" means that  
521 the building can be used again immediately. This could be the reason why in Fig. 4 the  
522 "observation based" probabilities for damage grade 2 are notably low when compared  
523 against damage grades 1 and 3 (the distribution has an unusual "valley" in damage grade  
524 2). Can it be that several of the green buildings that ended up classified as damage grade  
525 3 are, actually, damage grade 2? Moreover, Table 3-6 suggests the authors also believe  
526 green should map only to damage grade 1 or 2.  
527

528  
529

528 This is a very good point, and we agree with this comment. Indeed, there may be green  
529 buildings which could have been assigned a damage grade 2. The classification that we  
530 propose assigns damage grade 3, when the vertical or the horizontal structural elements  
531 have a yellow tag. We believe that a yellow tag with respect to the structural elements  
532 signifies moderate structural damage, hence damage grade 3. The fact that in these cases  
533 a green tag was assigned, perhaps indicates that a further inspection took place, which  
534 either reclassified the damage as green structural damage, or as yellow non-structural  
535 damage. We acknowledge that our mapping scheme can be refined to take into account  
536 such cases.  
537

538  
539

538 The "valley" in damage grade 2, which you refer to, will be discussed in the revised  
539 manuscript based on your comments and this response.  
540

541  
542

542 5. Associated with the previous point, there seem to be different probabilities of damage and  
543 numbers of damaged buildings from observations presented in different plots and the text,  
544 which I have found confusing. I have found/observed:  
545

546  
547

546 5.a. The probabilities of damage from observations differ in Fig. 4 with respect to Fig. 5.

548  
549

548 Thank you for raising this issue. Please accept our apologies for omitting the calculation of  
549 the probabilities in Fig. 5.a labelled as "Observation-based". These probabilities take into  
550 account the probabilities in Fig. 4 as well as our presumption that the damage grade  
551 probabilities for the buildings that have not been inspected are different, because the

552 inspections were made upon owner request. The calculation of the probabilities in Fig. 5.a is  
 553 done with the following tables (Tables 5.a.1-4). Table 5.a.1 includes the probabilities of the  
 554 damage grades conditioned on colour tags. In Table 5.a.2, the total probabilities of the  
 555 damage grades is calculated. Table 5.a.3 gives the damage grade probabilities conditioned  
 556 on whether a building has been inspected. The first line of Table 5.a.3 includes the  
 557 probabilities based on the damage observations. The second line includes values selected  
 558 based on our judgement. The calculation of the total probabilities of the damage grades for  
 559 inspected and uninspected buildings, which are the probabilities in Fig. 5.a labelled as  
 560 "Observation-based", is given in Table 5.a.4. The description of this calculation as well as  
 561 Tables 5.a.1-4 will be included in the revised manuscript.

562  
 563  
 564 Table 5.a.1: Probabilities of the damage grades conditioned on the colour tag assigned to a  
 565 building that has been inspected during the survey

| tag    | n_buildings | P(tag) | P(DG1 tag) | P(DG2 tag) | P(DG3 tag) | P(DG4 tag) | P(DG5 tag) |
|--------|-------------|--------|------------|------------|------------|------------|------------|
| Green  | 238         | 0.475  | 0.610      | 0.150      | 0.240      | 0.000      | 0.000      |
| Yellow | 157         | 0.313  | 0.000      | 0.000      | 0.900      | 0.080      | 0.020      |
| Red    | 106         | 0.212  | 0.000      | 0.000      | 0.000      | 0.640      | 0.360      |

566  
 567  
 568 Table 5.a.2: Calculation of the total probability of the damage grades for buildings inspected  
 569 during the survey

| tag    | P(DG1 tag)·P(tag) | P(DG2 tag)·P(tag) | P(DG3 tag)·P(tag) | P(DG4 tag)·P(tag) | P(DG5 tag)·P(tag) |
|--------|-------------------|-------------------|-------------------|-------------------|-------------------|
| Green  | 0.290             | 0.071             | 0.114             | 0.000             | 0.000             |
| Yellow | 0.000             | 0.000             | 0.282             | 0.025             | 0.006             |
| Red    | 0.000             | 0.000             | 0.000             | 0.135             | 0.076             |
| Sum:   | 0.290             | 0.071             | 0.396             | 0.160             | 0.082             |

570  
 571  
 572 Table 5.a. 3: Probabilities of the damage grades conditioned on whether a building has been  
 573 inspected

| Inspected | P(Insp.) | P(DG1 Insp.) | P(DG2 Insp.) | P(DG3 Insp.) | P(DG4 Insp.) | P(DG5 Insp.) |
|-----------|----------|--------------|--------------|--------------|--------------|--------------|
| TRUE      | 0.180    | 0.290        | 0.071        | 0.396        | 0.160        | 0.082        |
| FALSE     | 0.820    | 0.500        | 0.300        | 0.100        | 0.050        | 0.050        |

574  
 575  
 576 Table 5.a.4: Calculation of the total probabilities of the damage grades accounting for both  
 577 inspected and uninspected buildings

| Inspected | P(DG1 Insp.)·P(Insp.) | P(DG2 Insp.)·P(Insp.) | P(DG3 Insp.)·P(Insp.) | P(DG4 Insp.)·P(Insp.) | P(DG5 Insp.)·P(Insp.) |
|-----------|-----------------------|-----------------------|-----------------------|-----------------------|-----------------------|
| TRUE      | 0.052                 | 0.013                 | 0.071                 | 0.029                 | 0.015                 |
| FALSE     | 0.410                 | 0.246                 | 0.082                 | 0.041                 | 0.041                 |
| Sum:      | 0.462                 | 0.259                 | 0.153                 | 0.070                 | 0.056                 |

578  
 579  
 580  
 581 5.b. The numbers of buildings from observations in Fig. 5b are much larger than the 327  
 582 buildings included in the damage survey. Why is this the case?

583  
 584 Thank for this question. The numbers of buildings in Fig. 5b are calculated by multiplying  
 585 the total number of buildings in the exposure model by the probabilities in Fig. 5a. The  
 586 numbers reported as "Observation-based" result from the multiplication with the

587 probabilities calculated according to our response to the previous comment (comment  
588 5.a). We acknowledge that the figure may mislead the reader to think that the numbers in  
589 Fig. 5b correspond to numbers of observations. Therefore, we will rename the label  
590 "Observation-based" in the legends in Fig. 5a-5b to "Calc. on insp.", shorthand for  
591 "Calculation based on the damage grade probabilities for inspected and uninspected  
592 buildings".

593  
594  
595 5.c. At the same time, the plots in Fig. 5 have two separate categories, "Exp. judg.-  
596 based" and "Observation-based", but I have found no explanation regarding what this  
597 means, as lines 324-326 only say "Two of the sources consist of probabilities based on  
598 expert judgement ("Exp. judg.- based"), and probabilities based on our conversion of the  
599 damage observations to damage grades ("Observation-based)", but the meaning of  
600 "based on expert judgement" is not explained. It is noted as well that "our conversion of  
601 the damage observations to damage grades" is also "expert judgment", and thus the  
602 difference between the two requires a more detailed clarification.

603  
604 It is true that both results labelled as "Exp. judg.-based" and "Observation based" have  
605 been calculated using expert judgment to different extents. Please see our responses to  
606 comments 5.a and 5.d, which also respond to comment 5.c.

607  
608  
609 5.d. The above makes me wonder if one of the two "observation" labels in the plots in Fig.  
610 5 has been created using Table 3-6. I have been unable to find any reference to Table 3-  
611 6. Please clarify if Table 3-6 is being used and reference it within the text if this is the  
612 case.

613  
614 Yes, Table 3-6 is used for one of the probabilities in Fig 5.a labelled "Exp. judg.-based".  
615 We will clarify this with a more precise nomenclature. We will add a table that explains how  
616 the "observations-based" damage distributions have been generated (see table in our  
617 answer to Comment 7.c in the section "Reviewer 1 - Main Comments"). That table will  
618 include a reference to Table 3-6.

619  
620  
621 5.e. If more than one method has been used to obtain damage grades from the survey  
622 data (apart from the one described in Section 2.2), all methods need to be specified (and  
623 given distinct names/labels) in Section 2.2.

624  
625 We agree with your suggestion: see our answer above and our proposition to add a table  
626 describing these methods (answer to Comment 7.c in the section "Reviewer 1 - Main  
627 Comments").

628  
629  
630 5.f. The conclusions state "The proposed testing procedure based on the observed  
631 damages could be improved by introducing a probabilistic rule for the conversion of  
632 damage observations on the three level colour tag (red, yellow, green) scale to the EMS-  
633 98 damage scale" (lines 364-365). To my understanding, this is exactly what Table 3-6 is  
634 showing. If this is the case, and it has been used, then please adjust the conclusions.

635  
636 We acknowledge that the manuscript is not clear. The revised manuscript will say instead  
637 that one could introduce a conversion rule, which would return damage grade probabilities  
638 instead of a single value for the damage grade as a function of the colour tags for structural  
639 and non-structural elements. Thank you for this comment.

640  
641

642 5.g. I cannot find any reason for Table 3-6 not to be used. Showing and discussing  
 643 "observed" damage results obtained using both strategies (Table 2-1 and Table 3-6),  
 644 which is potentially what is shown in Fig. 5 but not sufficiently explained, would convey to  
 645 the reader the inherent uncertainty involved in the comparison between the models and  
 646 the observations (i.e., "observations" are not a ground truth), which is fundamental in any  
 647 comparison between models and data (i.e., the uncertainties do not only exist in the  
 648 models).

649  
 650 Thank you for this comment. Table 3-6 is used to calculate the probabilities in Fig. 5.a  
 651 labelled as "Exp. judg.-based".  
 652  
 653

654 6. Associated with the previous point, please explain in the paper how the ESRM20 damage  
 655 scale (associated with the ESRM20 fragility models) was converted into the EMS-98 scale,  
 656 as this is another source of uncertainty in the comparison.  
 657

658 Thank you very much for this comment. Indeed, this conversion can be a source of uncertainty.  
 659 It will be described in the revised manuscript. The conversion was done by matching the  
 660 damage states/grades based on the structural damage since both scales assume the level of  
 661 non-structural damage based on the level of structural damage. A table like the following will  
 662 be added to the manuscript:  
 663

664 Table: Conversion of the damage scale of the ESRM20 fragility models to the EMS-98 damage  
 665 scale on the basis of structural damage  
 666

| ESRM20                                                                                                                                              | EMS98                                                                                                    |
|-----------------------------------------------------------------------------------------------------------------------------------------------------|----------------------------------------------------------------------------------------------------------|
| D0 no damage (combined structural and non-structural damage) [This damage state is not explicitly mentioned by the damage scale, but it is implied] | Grade 0 No damage [This damage state is not explicitly mentioned by the damage scale, but it is implied] |
|                                                                                                                                                     | Grade 1: Negligible to slight damage (no structural damage, slight non-structural damage)                |
| D1 slight (combined structural and non-structural damage)                                                                                           | Grade 2: Moderate damage (slight structural damage, moderate non-structural damage)                      |
| D2 moderate (combined structural and non-structural damage)                                                                                         | Grade 3: Moderate damage (moderate structural damage, heavy non-structural damage)                       |
| D3 extensive (combined structural and non-structural damage)                                                                                        | Grade 4: Very heavy damage (heavy structural damage, very heavy non-structural damage)                   |
| D4 complete (combined structural and non-structural damage)                                                                                         | Grade 5: Destruction (very heavy structural damage)                                                      |

667  
 668  
 669 7. Lines 110 and 161: The titles of Sections 3.1 and 3.2 need to be changed, as they do not  
 670 reflect the content of these sections. Neither section presents a test. They are both a  
 671 procedure to select a rupture model to carry out the damage comparisons. The first sentence  
 672 of Section 3.1 needs to be changed as well, as the section does not present a comparison  
 673 against macroseismic intensities.  
 674

675 The titles of Sections 3.1 and 3.2, as well as the first sentence of Section 3.1, will be changed  
 676 in the revised manuscript based on the comment. Indeed, these sections are a procedure to  
 677 select a rupture model to carry out the damage comparisons.  
 678



679  
680  
681  
682  
683  
684  
685  
686  
687  
688  
689  
690  
691  
692  
693  
694  
695  
696  
697  
698  
699

8. Line 111 (and other instances): Although the citation of the Wald et al. (2022) paper indicates that it is the USGS ShakeMap that is being used, it would be good to be explicit (by saying “USGS ShakeMap”), as the USGS ShakeMap software is also used by other organisations with their own configuration (e.g., the European ShakeMap, the Italian ShakeMap).

We will clarify this sentence, as stated in our answer to Comment 3c. In this study, we have generated the shake-map ourselves, using our specific configuration of the USGS ShakeMap software.

9. Line 114: Which site model was used for the ground motion comparisons?

Thank you for this question. The revised manuscript will describe the site model that was used. It is a site model including one point for each exposure centroid, with the same coordinates as its corresponding exposure centroid. The VS30 was inferred based on the EC8 soil class map by the BRGM for the French territory (Roullé & Monfort, 2016). Specifically, the median of each class was taken as the  $V_{s30}$ . The outputs of the Vs30 site model for the exposure centroids are given in the next table, which could be added to the revised manuscript:

| Centroid | latitude | longitude | region | brgm $V_{s30}$ (m·s <sup>-1</sup> ) | ESHM20 $V_{s30}$ (m·s <sup>-1</sup> ) | $V_{s30}$ Type | geology    | slope  |
|----------|----------|-----------|--------|-------------------------------------|---------------------------------------|----------------|------------|--------|
| 0        | 44.5546  | 4.6835    | 1      | 800                                 | 807                                   | inferred       | CRETACEOUS | 0.0823 |
| 1        | 44.5453  | 4.6804    | 1      | 270                                 | 831                                   | inferred       | CRETACEOUS | 0.0645 |
| 2        | 44.5414  | 4.6846    | 1      | 270                                 | 730                                   | inferred       | HOLOCENE   | 0.0487 |
| 3        | 44.5405  | 4.6498    | 1      | 800                                 | 726                                   | inferred       | CRETACEOUS | 0.0768 |
| 4        | 44.5347  | 4.6713    | 1      | 800                                 | 831                                   | inferred       | CRETACEOUS | 0.0467 |
| 5        | 44.5500  | 4.6909    | 1      | 270                                 | 699                                   | inferred       | HOLOCENE   | 0.0160 |
| 6        | 44.5442  | 4.6699    | 1      | 800                                 | 830                                   | inferred       | CRETACEOUS | 0.0522 |
| 7        | 44.5547  | 4.6692    | 1      | 580                                 | 840                                   | inferred       | CRETACEOUS | 0.0503 |
| 8        | 44.5315  | 4.6953    | 1      | 270                                 | 644                                   | inferred       | HOLOCENE   | 0.0439 |

700  
701  
702  
703  
704  
705  
706  
707  
708  
709  
710  
711  
712  
713  
714  
715  
716  
717  
718  
719  
720

Associated reference :

Monfort, C., & Roullé, A. (2016). Estimation statistique de la répartition des classes de sol Eurocode 8 sur le territoire français - Phase 1 : Rapport final. BRGM Report RP-66250-FR.

10. Line 139 states that the ground motions were “aggregated over all exposure centroids”, but it is not specified whether the values shown are means or medians (of all points). Please specify.

The scenario analyses generated samples of the ground motion intensity measures at the locations of the exposure centroids. The boxplots concern the entirety of the samples for all centroids. Thank you for this comment. This will be clarified in the revised manuscript.

11. Line 139: It is stated that ground motions are calculated at the exposure centroids. However:

11.a. To my understanding, OpenQuake does not calculate the ground motions at the exposure points themselves but at the points of the site model that are closest neighbours to the exposure points (and assigns the ground motions to the exposure

721 points by closest neighbours, not interpolation). This can be checked by looking at the  
722 sitemesh\_XXX.csv output by OpenQuake, as this shows the locations at which ground  
723 motions were calculated. If this is the case, it would be relevant to know what site model  
724 is being used and its resolution with respect to the resolution of the exposure points.  
725

726 Thank you for this comment. The site model includes points with coordinates identical with  
727 those of the exposure points. The manuscript will be revised accordingly. See also the  
728 reply to Comment 9 in the section "Reviewer 1 - Other Comments on Content".  
729

730 11.b. At this stage, the exposure model has not been described, and different exposure  
731 models are used later on in the paper. Please indicate if the "exposure centroids" refer to  
732 the building-by-building data of the post-earthquake damage survey or other locations.  
733

734 The exposure centroids refer to the 9 centroids of the 9 infra-municipality districts in  
735 BRGM's exposure model for the town of Le Teil (Table 3-5). This will be clarified in the  
736 revised manuscript. Thank you for this comment.  
737

738  
739 12. Lines 149-150: It would be relevant to comment on whether the USGS ShakeMap for this  
740 earthquake was constrained with direct ground motion measurements (from stations) and/or  
741 Did You Feel It macroseismic intensity observations. For reproducibility, please include as  
742 well the version of the USGS ShakeMap used, as the USGS recalculates ShakeMaps when  
743 new data or new algorithms become available.  
744

745 As stated in previous answers to comments ,we have generated the shake-map ourselves,  
746 using our specific configuration of the USGS ShakeMap software (version 4). The parameters  
747 related to this shake-map are detailed in the table that we propose to add (see GM4 in the  
748 table added in the answer to Comment 3c).  
749

750 The shake-map for this earthquake was constrained with ground motion measurements only  
751 (no DYFI). However, the closest stations are over 15 km from the epicentre, which leads to  
752 practically no constraint. We will discuss this issue in the revised manuscript.  
753

754  
755 13. Line 151, Fig. 1: It would help the reader if the vertical axis contained the non-logarithmic  
756 values of the IM (potentially side by side with the logarithmic ones, or as a scale on the right  
757 side of the plot).  
758

759 Fig. 1 will be revised according to this comment.  
760

761  
762 14. Line 181, Table 3-2: Is it relevant to show the parameters for the CA2015 model and not  
763 the FM2010 model?  
764

765 The parameters for the FM2010 model will be added to the revised manuscript as well.  
766

767  
768 15. Lines 193 and 197 use the acronym "KO2020", which has not been defined.  
769

770 Any reference to KO2020 will be removed, and the rest of the manuscript will be revised  
771 accordingly. We apologize that this was left after a revision of a working version of the  
772 manuscript. Thank you for this comment.  
773

774

775 16. Lines 210-226: There are some aspects of the comparison shown in Section 3.3.1 that  
776 are not explained and are relevant for interpreting the results. Please specify in the paper:  
777

778 16.a. Lines 212-213 state that the “ESHM20 ground motion logic tree” was used, but so  
779 far there has been no reference to the ESHM20 ground motion logic tree, only to the  
780 KothaEtAl2020Site implementation of the Kotha et al. (2020) GMPE, which, as explained  
781 earlier, is not the one used in ESHM20. Please clarify which logic tree is being used.  
782

783 Thank you for requesting this clarification. Indeed, in Section 3.2 no ground motion logic  
784 tree is used. For the calculation in Section 3.3.1, the ESHM20 ground motion logic tree is  
785 being used, which employs the GMPE «KothaEtAl2020ESHM20». The revised manuscript  
786 will include this clarification.  
787

788 From a technical point of view, the file gmpe\_complete\_logic\_tree\_5br.xml was edited by  
789 removing all other «logicTreeBranchSet» other than «branchSetID="Shallow\_Def"», which  
790 corresponds to the regime of the study area, because errors related to the removed  
791 branches were preventing the completion of the analysis. In our opinion, this technical  
792 detail will not be of interest to the readers, but it will be included in the revised manuscript  
793 unless you consider it should be.  
794

795  
796 16.b. Lines 214-215: If “equivalent” exposure and fragility models are being used “so as  
797 to limit the effect of these two factors on the differences between the two estimations”,  
798 what is the purpose of this comparison? Comparing a model in Armagedom against a  
799 model in OpenQuake? Is the equivalence between the models fully guaranteed? Please  
800 clarify the purpose of the comparison presented in Section 3.3.1.  
801

802 OpenQuake and Armagedom use different methods for the damage estimation.  
803

804 As mentioned previously, Armagedom uses the RISK-UE semi-empirical macroseismic  
805 method. This is based on the intensity values and a vulnerability index for the calculation of  
806 the mean damage degree for the beta distribution.  
807

808 OpenQuake uses ground motion intensities and fragility curves.  
809

810 The two methods are obviously different, but, no matter what their path, the results of both  
811 methods have the same aim: asses the damages after an earthquake. Considering this  
812 same objective, the results from the two methods can be compared.  
813

814 Nevertheless, we agree with your comment, and we will add a paragraph to summarise  
815 both methods.  
816

817 A few articles attempt to address the issue (e.g. Lestuzzi et al. 2016).

818 Lestuzzi, P., Podestà, S., Luchini, C. et al. Seismic vulnerability assessment at urban scale  
819 for two typical Swiss cities using Risk-UE methodology. Nat Hazards 84, 249–269 (2016).  
820 <https://doi.org/10.1007/s11069-016-2420-z>  
821

822  
823 16.c. Lines 215-216: Please clarify in the paper the meaning of “the exposure model in  
824 Armagedom”. I am not familiar with the software, but the paper of Sedan et al. (2013)  
825 gives the impression that Armagedom is a software and the user can input any exposure  
826 model as desired. Please clarify in the paper how this exposure model was defined.  
827

828 Yes, we will explain the exposure model used in Armagedom, based on vulnerability  
829 indices of building classes. A more detailed answer and paragraph is available below (see

830 answer to Comment 25). Yes, Armagedom is able to treat any exposure model, as long as  
831 the preliminary step of converting building class to vulnerability indices is carried out.  
832

833

834 16.d. Lines 215-221: Does the exposure model used in OpenQuake maintain the 9  
835 centroids mentioned in line 217?

836

837 Yes, it does.

838

839

840 16.e. Please comment in the paper (a paragraph would suffice) about the details of the  
841 damage calculation in Armagedom: use of conversion models to transform PGA into  
842 macroseismic intensity, calculation of a mean damage grade as a function of  
843 macroseismic intensity, distribution into damage grades under the assumption of a Beta  
844 distribution, etc. This method is fundamentally different from the calculation carried out in  
845 OpenQuake in terms of PGA/SA, with damage grades directly retrieved from the fragility  
846 model, conversion of ESRM20 damage grades into ESM-98 damage grades, etc. Without  
847 these details and comparisons, it may not be fully evident to the reader what the purpose  
848 of this section is.

849

850 Thank you for this comment. It is indeed worth describing the procedure used by  
851 Armagedom and highlighting the differences from the calculation in OpenQuake. A  
852 paragraph on this subject will be added to the revised manuscript.

853

854

855 16.f. Lines 224-225: These sentences compare the values obtained against observations,  
856 but the percentages of “heavy” and “very heavy” damage observed are not reported.  
857 Please add them in the text. It is also not clear why the observed values are not shown in  
858 Fig. 3, given that they are shown later in Figs. 4 and 5 (converting number of buildings  
859 into proportions, as in the other plots, or using a right-hand axis with a different scale on  
860 the same plot).

861

862 Thank you for this comment. Indeed the values calculated based on the observations  
863 should have been included in Fig. 5, and they will be included in the revised manuscript.  
864 We should note that since the percentages concern the entire town of Le Teil, the  
865 percentages calculated based on the observations are calculated according to our  
866 response to comment 4 in the section “Reviewer 1 - Other Comments on Content”. The  
867 revised manuscript will also report the percentages for “heavy” and “very heavy” damage.

868

869

870 16.g. Do the OpenQuake damage results correspond to the average damage resulting  
871 from all 1,000 ground motion realisations (only mentioned in Section 2.1) and all logic  
872 tree branches (if a ground motion logic tree was indeed used)? Please specify.

873

874 Yes, they do correspond to the average damage from all ground motion realisations for all  
875 logic tree branches. The manuscript will be revised accordingly. Thank you for this  
876 comment.

877

878

879 16.h. Does Armagedom calculate different ground motion fields (1,000 as well?) to  
880 account for ground motion uncertainty?

881

882 No, currently, Armagedom does not generate stochastic samples of ground-motion fields.  
883 It applies the GMM and estimates only the mean ground-motion parameters across the  
884 map.

885  
886  
887  
888  
889  
890  
891  
892  
893  
894  
895  
896  
897  
898  
899  
900  
901  
902  
903  
904  
905  
906  
907  
908  
909  
910  
911  
912  
913  
914  
915  
916  
917  
918  
919  
920  
921  
922  
923  
924  
925  
926  
927  
928  
929

17. Line 240: To my knowledge, the most recent reference of GED4ALL is Silva et al. (2022), and the preferred name for this building taxonomy is “GEM Building Taxonomy v3.0”:

Silva V, Brzev S, Scawthorn C, Yepes C, Dabbeek J, Crowley H (2022) A building classification system for multi-hazard risk assessment. International Journal of Disaster Risk Science 13:161–177. <https://www.doi.org/10.1007/s13753-022-00400-x>

Thank you for indicating the correct reference. It will be corrected in the revised manuscript.

18. Line 240: I would suggest to re-phrase “we selected a GED4ALL building class based on...” as “we defined building classes in terms of the GEM Building Taxonomy v3.0 (Silva et al., 2022), based on the building materials and the number of storeys”. The current phrasing may erroneously convey that the taxonomy consists of a pre-defined list of building classes to choose from, instead of a classification system of attributes to be concatenated.

Thank you very much for this suggestion. We see how the phrasing may be misleading. As suggested, we will rephrase this in the revised manuscript.

19. Line 245, Table 3-4: It is interesting that fragility models for infilled frames (“CR\_LFINF”) were selected for dual frame-wall systems (“CR/LDUAL”), instead of using the “CR\_LDUAL” fragility models directly (one of which is mentioned in Table 3-3). Please comment in the paper on this choice. Moreover, the reinforced concrete ESRM20 classes selected correspond to different values of the lateral force coefficient, and it is not clear how this could be selected from the damage dataset. Please comment.

Thank you for this comment. We made the arbitrary choice to classify the reinforced concrete buildings in the dataset as CR/LDUAL. We should have simply assigned to them a CR class.

We agree that the lateral force coefficient may not be selected based on the damage dataset. Moreover, we did not consider it during the selection of the fragility models. We assigned an EMS98 vulnerability class based on the year of construction. Subsequently, we selected fragility models, which we considered to be in agreement with the construction material and the EMS98 vulnerability classes.

20. Lines 249-254: Please specify the GMPE used.

The GMPE KothaEtAl2020Site has been used; but with the proposed revisions, we will now apply two GMMs (KothaEtAl2020Site and KothaEtAl2020ESHM20SlopeGeology). This will be better explained thanks to the following table:

| GM Map ID | Type                | GMM                               | Site model                    | Rupture model | Observations     |
|-----------|---------------------|-----------------------------------|-------------------------------|---------------|------------------|
| GM1       | ground-motion field | KothaEtAl2020 Site                | BRGM soil classes to Vs30     | Ritz et al.   | No               |
| GM2       | ground-motion field | KothaEtAl2020 ESHM20Slope Geology | Slope & Geology (ESRM20 data) | Ritz et al.   | No               |
| GM3       | ground-motion field | KothaEtAl2020 Site                | ESRM20 Vs30 data              | Ritz et al.   | No               |
| GM4       | shake-map           | KothaEtAl2020 Site                | BRGM Soil class to Vs30       | Ritz et al.   | Seismic stations |

930

931  
 932 21. Lines 254-256: The label “SM – brgm VS30” suggests that the BRGM model was used  
 933 together with the USGS ShakeMap. How was this site model incorporated to the ShakeMap?  
 934 Does this mean the ShakeMap used in the paper is not the one downloaded from the USGS  
 935 but the authors have run the ShakeMap software themselves? Please clarify in the  
 936 manuscript.

937  
 938 As stated in previous answers to comments, we have generated the shake-map ourselves,  
 939 using our specific configuration of the USGS ShakeMap software (version 4). The parameters  
 940 related to this shake-map are detailed in the table that we propose to add (see GM4 in the  
 941 table added in the answer to Comment 3c). We will revise the nomenclature of these labels  
 942 (“SM – brgm Vs30”) according to that new table.  
 943

944  
 945 22. Line 283 (Fig. 4) and Line 341 (Fig. 5): Please clarify if the proportions of buildings in  
 946 each damage grade stemming from the calculations have been calculated with respect to the  
 947 total number of buildings (including undamaged ones) or only the number of damaged  
 948 buildings (which I understand is the case for the observation values).  
 949

950 Thank you for requesting this clarification. In the revised manuscript, it will be clarified by a  
 951 new table (as introduced in our answer above), which will explain the number of buildings  
 952 considered in each comparison (differences between Fig. 4 and Fig. 5):  
 953

| Observed Damage Data ID | Exposure resolution                           | Exposure data                           | Damage estimation method                                                               | Damage conversion method                                                                                                                  |                   |
|-------------------------|-----------------------------------------------|-----------------------------------------|----------------------------------------------------------------------------------------|-------------------------------------------------------------------------------------------------------------------------------------------|-------------------|
| DD1                     | Building-by-building (327 buildings)          | AFPS emergency survey                   | AFPS emergency observations on 327 buildings (Green/Yellow/Red tags)                   | Conversion to EMS-98 damage grades (Tab. 2.1)                                                                                             | Related to Fig. 4 |
| DD2                     | Infra-municipality districts (2778 buildings) | National statistics database (BRGM-CCR) | AFPS emergency observations on 327 buildings (Green/Yellow/Red tags) + “Extrapolation” | Conversion to EMS-98 damage grades with expert judgment (Tab. 3.6)                                                                        | Related to Fig. 5 |
| DD3                     | Infra-municipality districts (2778 buildings) | National statistics database (BRGM-CCR) | AFPS emergency observations on 327 buildings (Green/Yellow/Red tags) + “Extrapolation” | Conversion to EMS-98 damage grades (Tab. 2.1) + Bias adjustment on total number of 2778 buildings (accounting for non-surveyed buildings) | Related to Fig. 5 |

954  
 955  
 956 23. Line 284 (caption of Fig. 4), and Table A3: Please clarify what the acronym “BRGM/CCR”  
 957 refers to. I find it confusing that it is named in Fig. 4, which corresponds to analyses carried  
 958 out using the buildingby-building exposure based on the 327 surveyed buildings, and then in  
 959 Table A3, which lists 2,778 buildings, which is the number reported in both Sections 3.3.1  
 960 (line 216, “the exposure model in Armagedom, which includes 2778 buildings”) and 3.3.4  
 961 (lines 293-294, “the second exposure model (“brgm exp.”) is based on national statistical  
 962 data, and includes 9 centroids with 2778 buildings”). Please clarify the relation between the  
 963 exposure models used in Sections 3.3.1 and 3.3.4: are they the same? Please add reference  
 964 to Table A3 within the text.  
 965

966 The nomenclature of the exposure models will be clarified: the “BRGM/CCR” label refers to  
 967 the same exposure model as “brgm-exp”. This will also be clarified by the above table of  
 968 observed damage data.

969 We will add a reference to Table A3 in the text.

970  
 971  
 972  
 973 24. Lines 291-293, and Tables A1 and A2: It is not clear why the ESRM20 exposure model is  
 974 not being used directly as it is, including its exposure-to-vulnerability mapping. The changes  
 975 introduced by the authors mean that the calculations carried out with this model may not  
 976 necessarily reflect what would have been obtained with the “original” ESRM20 model.

977  
 978 Moreover, the choice of fragility classes for each exposure class shown in Table A1 appears  
 979 as contradictory. In the screenshot of Table A1 below, I have marked the differences in the  
 980 classes and annotated the classes used in ESRM20, which can be consulted in the  
 981 esrm20\_exposure\_vulnerability\_mapping.csv file of the ESRM20 v1.0 repository<sup>5</sup>. The  
 982 differences are associated with the number of storeys (e.g., a 4-storey class has been  
 983 selected for a 6-and-above-storey class, first row) and the lateral force coefficient and/or  
 984 design code level (e.g., a low code class with 15% lateral force coefficient has been selected  
 985 for a no-code class, seventh row). Please justify the need to use a “simplified” version of the  
 986 exposure model (instead of the original ESRM20 exposure) and explain the criteria used to  
 987 assign new classes in Table A1 (in the main body of the paper).  
 988

**Table A1 Selected ESRM20 fragility classes based on the building types in Le Teil according to the ESRM20**

| Original ESRM20 type          | N. buildings | Selected ESRM20 frag. class | # class |
|-------------------------------|--------------|-----------------------------|---------|
| CR/LDUAL+CDL+LFC:4.0/HBET:6-  | 3            | CR_LDUAL-DUL H4 H6          | 1       |
| CR/LDUAL+CDL+LFC:4.0/HBET:3-5 | 7            | CR_LDUAL-DUL_H4             | 1       |
| CR/LDUAL+CDN/HBET:6-          | 2            | CR_LDUAL-DUL H4 H6          | 1       |
| CR/LFINF+CDL+LFC:4.0/H:2      | 67           | CR_LFINF-CDL-10 H2 CDL-5    | 2       |
| CR/LFINF+CDM+LFC:4.0/H:1      | 42           | CR_LFINF-CDM-10 H2 CDM-5_H1 | 3       |
| CR/LDUAL+CDM+LFC:4.0/HBET:6-  | 1            | CR_LDUAL-DUL H4 H6          | 1       |
| CR/LFLS+CDN/HBET:6-           | 9            | CR_LFINF-CDL-15 H4 CDN-0_H6 | 4       |
| CR/LFINF+CDL+LFC:4.0/H:1      | 76           | CR_LFINF-CDM-10 H2 CDL-5_H1 | 2       |
| CR/LDUAL+CDM+LFC:4.0/HBET:3-5 | 3            | CR_LDUAL-DUL_H4             | 1       |
| MUR+CL/LWAL+CDN/H:2           | 378          | MUR-CL99_LWAL-DNO_H2        | 5       |
| CR/LFINF+CDM+LFC:4.0/H:2      | 37           | CR_LFINF-CDM-10 H2 CDM-5    | 3       |
| MUR+CL/LWAL+CDN/H:1           | 690          | MUR-CL99_LWAL-DNO_H1        | 6       |
| MUR+ST/LWAL+CDN/H:2           | 130          | MUR-CL99_LWAL-DNO_H2 STDRE  | 5       |
| CR+PC/LWAL+CDN/HBET:3-5       | 53           | CR_LDUAL-DUL_H4             | 1       |
| W/LWAL+CDN/H:1                | 100          | W_LFM-DUL H2 H1             | 7       |
| W/LWAL+CDN/H:2                | 43           | W_LFM-DUL_H2                | 7       |
| CR+PC/LWAL+CDN/HBET:6-        | 1            | CR_LDUAL-DUL H4 H6          | 1       |
| CR/LFINF+CDN/HBET:3-5         | 38           | CR_LFINF-CDL-15 H4 CDN-0    | 4       |

989  
 990  
 991 The ESRM20 model includes a number of building classes, which is higher than the number  
 992 of classes in the BRGM/CCR exposure model. Moreover, the ESRM20 model includes classes  
 993 with a small percentage of the total number of buildings, which could be grouped with similar  
 994 classes. For example, we decided to group in Class 1 (revised Table A1) buildings categories  
 995 with 6 or more storeys, which have a small number of buildings, together with buildings with 3-  
 996 5 storeys on the basis of the similarity of their load-bearing systems.

997  
 998 The merger of similar classes and the reduction of the total number of classes had the goal of  
 999 simplifying the comparisons. Moreover, we hoped that, if there were comparable classes, we

<sup>5</sup> [https://gitlab.seismo.ethz.ch/efehr/esrm20/-/blob/v1.0/Vulnerability/esrm20\\_exposure\\_vulnerability\\_mapping.csv](https://gitlab.seismo.ethz.ch/efehr/esrm20/-/blob/v1.0/Vulnerability/esrm20_exposure_vulnerability_mapping.csv)

1000 would be able to attribute differences in the results to specific classes based on the numbers  
 1001 and probabilities of damage per building class.

1002  
 1003 Revised Table A1

| Original ESRM20 type          | N. buildings | Selected ESRM20 frag. class | Class |
|-------------------------------|--------------|-----------------------------|-------|
| CR+PC/LWAL+CDN/HBET:3-5       | 53           | CR_LDUAL-DUL_H4             | 1     |
| CR/LDUAL+CDL+LFC:4.0/HBET:3-5 | 7            | CR_LDUAL-DUL_H4             | 1     |
| CR/LDUAL+CDM+LFC:4.0/HBET:3-5 | 3            | CR_LDUAL-DUL_H4             | 1     |
| CR/LDUAL+CDL+LFC:4.0/HBET:6-  | 3            | CR_LDUAL-DUL_H4             | 1     |
| CR/LDUAL+CDN/HBET:6-          | 2            | CR_LDUAL-DUL_H4             | 1     |
| CR+PC/LWAL+CDN/HBET:6-        | 1            | CR_LDUAL-DUL_H4             | 1     |
| CR/LDUAL+CDM+LFC:4.0/HBET:6-  | 1            | CR_LDUAL-DUL_H4             | 1     |
| CR/LFINF+CDL+LFC:4.0/H:1      | 76           | CR_LFINF-CDL-10_H2          | 2     |
| CR/LFINF+CDL+LFC:4.0/H:2      | 67           | CR_LFINF-CDL-10_H2          | 2     |
| CR/LFINF+CDM+LFC:4.0/H:1      | 42           | CR_LFINF-CDM-10_H2          | 3     |
| CR/LFINF+CDM+LFC:4.0/H:2      | 37           | CR_LFINF-CDM-10_H2          | 3     |
| CR/LFINF+CDN/HBET:3-5         | 38           | CR_LFINF-CDL-15_H4          | 4     |
| CR/LFLS+CDN/HBET:6-           | 9            | CR_LFINF-CDL-15_H4          | 4     |
| MUR+CL/LWAL+CDN/H:2           | 378          | MUR-CL99_LWAL-DNO_H2        | 5     |
| MUR+ST/LWAL+CDN/H:2           | 130          | MUR-CL99_LWAL-DNO_H2        | 5     |
| MUR+CL/LWAL+CDN/H:1           | 690          | MUR-CL99_LWAL-DNO_H1        | 6     |
| W/LWAL+CDN/H:1                | 100          | W_LFM-DUL_H2                | 7     |
| W/LWAL+CDN/H:2                | 43           | W_LFM-DUL_H2                | 7     |

1004  
 1005 However, in response to your suggestion, we propose to do an extra analysis using the original  
 1006 ESRM20 exposure model, in order to check potential differences. This will be discussed in the  
 1007 revised manuscript.

1008  
 1009  
 1010 25. Lines 291, 294: Please clarify in the manuscript that only residential buildings from the  
 1011 ESRM20 exposure model are being included in the calculation (I have deduced this from  
 1012 looking at the ESRM20 exposure model for France). Please clarify as well if the BRGM  
 1013 exposure considers only residential buildings as well, and whether it covers the same spatial  
 1014 extent (even better if using a map). Please clarify if the damage observations only cover  
 1015 residential buildings as well.

1016  
 1017 Yes, for the aggregated exposure models (Section 3.3.4) the BRGM exposure considers only  
 1018 residential buildings as well and it covers the same spatial extent (Teil administrative borders).  
 1019 The residential exposure data were extracted from the building census database at the  
 1020 municipality (and infra-municipality) level, provided freely by the national statistical database  
 1021 INSEE. Based on structural criteria available, as well as a pilot project in Bouches-du-Rhône  
 1022 Department (Sedan et al., 2008), which compared field investigation data and INSEE data at  
 1023 the departmental scale level, we derived a matrix—consisting of a cross between the age of  
 1024 construction, number of stories, and type of construction—for a simplified description of the  
 1025 vulnerability based on the INSEE data. Therefore, starting from INSEE statistics, we classified  
 1026 the buildings into EMS98 taxonomy classes. The EMS98 scale associates vulnerability classes  
 1027 (A, B, C, D, E, and F) to the most common structural types (masonry, reinforced concrete,  
 1028 steel, and wood), indicating the most likely, probable, and less probable ranges that a structural  
 1029 type belongs to a given vulnerability class. Then, the EMS98 taxonomy classes were converted  
 1030 into RISK-UE vulnerability indices, based on the method developed by (Lagomarsino and  
 1031 Giovinazzi, 2006; Milutinovic and Trendafiloski, 2003). A national classification was done in  
 1032 the past by brgm. More details about this procedure can be found in Fayjaloun et al. (2021).

1033  
 1034 For “building-by-building” exposure model (Sect 3.3.3) we used the AFPS database that  
 1035 concerns, as well, only the residential buildings.

1036  
 1037 Associated reference:



1038 Fayjaloun, R., Negulescu, C., Roullé, A., Auclair, S., Gehl, P., & Faravelli, M. (2021). Sensitivity  
1039 of earthquake damage estimation to the input data (soil characterization maps and building  
1040 exposure): Case study in the Luchon Valley, France. *Geosciences*, 11(6), 249.

1041  
1042  
1043 26. Lines 300-304: By using a weighting scheme for the so-called “ESHM VS30” model but  
1044 not for the BRGM model, this comparison becomes not just about the VS30 models but the  
1045 different ways of assigning values to an aggregated area. It would be useful to highlight this  
1046 further in the text.

1047  
1048 Thank you for pointing this out. We will add a sentence on this issue in the text:  
1049 “It should be noted that these two different ways to collect Vs30 values at the centroids  
1050 (weighted mean of Vs30 values across the area versus punctual value at the centroid) may  
1051 constitute an additional source of discrepancy, in addition to the initial differences between the  
1052 two Vs30 models.”

1053  
1054  
1055 27. Line 310, Table 3-5: The table shows 8 locations but the text (line 294) says “9  
1056 centroids”. Please correct where needed.

1057  
1058 We apologize for this mistake, as a line of the table was erased. The table will be corrected so  
1059 that it shows 9 locations. This will also be corrected throughout the manuscript in the revised  
1060 version.

1061  
1062 The new table will also contains new fields, providing values for the slope and geology related  
1063 to the 9 locations (since these parameters will be used by the  
1064 *KohtaEtAl2020ESHM20SlopeGeology* GMM). The new version of the table is shown in the  
1065 answer to Comment 9.

1066  
1067

## Reviewer 1 - Language Use, Typos

1068  
1069  
1070  
1071  
1072  
1073  
1074  
1075  
1076  
1077  
1078  
1079  
1080  
1081  
1082  
1083  
1084  
1085  
1086  
1087  
1088  
1089  
1090  
1091  
1092  
1093  
1094  
1095  
1096  
1097  
1098  
1099  
1100  
1101  
1102  
1103  
1104  
1105  
1106  
1107  
1108  
1109  
1110  
1111  
1112  
1113  
1114  
1115  
1116  
1117  
1118  
1119  
1120  
1121  
1122

Please make the following changes.

1. What do the authors mean with “ShakeMap analyses”? It seems to me that, in most cases, the authors simply mean “ShakeMaps”. Please revise and re-phrase all instances along the paper. Examples:

2.a. Line 14: Just “ShakeMaps in order to...”.

2.b. Line 49: Just “to distributions given by ShakeMaps”.

2. Line 10: “validated individually, although testing and validating”.

3. Line 12: “damage from past earthquakes”.

4. Line 15: “components of the 2020 European Seismic Hazard Model” (not “Euro-Mediterranean”).

5. Line 16: “the degree of damage” or “the damage grade”.

6. Line 22: “insured and uninsured direct economic losses”. I assume this was the intention, as only indirect economic losses are mentioned otherwise.

7. Line 23: “(PSHA, PSRA are...” (not “PSHR”).

8. Line 53: Please define VS30 in its first appearance (this line).

9. Line 77: “vulnerability classes” (small letters).

10. Line 93: “data in the forms that we used are” (no commas).

11. Line 101, Table 2-1: “Vertical load-bearing” and “Horizontal load-bearing” (not “loads”).

12. Line 115: “the ruptures in the ShakeMap as well as”.

13. Line 121: “scaling relation”.

14. Line 123: “we assume that its geometric centroid is located at the hypocentre”.

15. Line 131, Table 3-1: In the caption, “Rupture parameters associated with the five source models”.

16. Line 156, Fig. 1, caption: “ground motion intensity measures aggregated from all exposure centroids”.

17. Line 164: “to identify the ruptures leading to”.

18. Line 168: The equation starts “MCS =” but the subscript of the standard deviation says “MMI”. Is this correct? (See line 170 as well).

19. Line 177: “The CA2015 model”.

20. Line 201: “(FM2010), and b) the macroseismic intensity”.

- 1123 21. Line 203: “PGA given by and the ground motion-to-intensity”.  
1124  
1125 22. Line 210, caption: “at the exposure centroids of the BRGM exposure in the site  
1126 models...” (or appropriate name for the exposure model).  
1127  
1128 23. Line 350: “closer to the estimation of EMS-98 macroseismic intensity by Schlupp et al.  
1129 (2022)”. The text before that statement had not yet mentioned macroseismic intensity.  
1130  
1131

## 1132 **Reviewer 1 - Issues with References**

1133

- 1134 1. Line 384: There are numbers at the end of “Munson” and “Stamatakos”.  
1135  
1136 2. Lines 396-397: The citation of Crowley et al. (2021) is incomplete (no initials of first  
1137 names, no DOI, mention of EFEHR Technical Report 002 missing). Please cite as (apply  
1138 journal formatting style):  
1139

1140 Crowley, H., Dabbeek, J., Despotaki, V., Rodrigues, D., Martins, L., Silva, V., Romão, X.,  
1141 Pereira, N., Weatherill, G. and Danciu, L., 2021. European Seismic Risk Model (ESRM20),  
1142 EFEHR Technical Report 002, V1.0.1, 84 pp, <https://doi.org/10.7414/EUC-EFEHR-TR002-ESRM20>  
1143

- 1144  
1145 3. Lines 408-411: The citation of Danciu et al. (2021) is not fully correct. Please cite as :  
1146

1147 Danciu, L., Nandan, S., Reyes, C., Basili, R., Weatherill, G., Beauval, C., Rovida, A.,  
1148 Vilanova, S., Sesetyan, K., Bard, P.-Y., Cotton, F., Wiemer, S., and Giardini, D.: The 2020  
1149 update of the European Seismic Hazard Model: Model Overview, EFEHR Technical Report  
1150 001, V1.0.0, <https://doi.org/10.12686/A15>, 2021.  
1151

1152 **The issues with the References, as well as the typos and the instances of incorrect language**  
1153 **use will be corrected in the revised manuscript. Thank you for pointing them out.**  
1154

## 1155 **Reviewer 2**

---

1156  
1157 Review of Manuscript egosphere-2023-1740

1158 Testing the 2020 European Seismic Hazard and Risk Models using data from the 2019 Le  
1159 Teil (France) earthquake

1160  
1161 The manuscript is a research study devoted to carry out a testing and validation study of  
1162 components involved in the seismic hazard and seismic risk estimation. The testing of  
1163 ground motion and damage to building is done using several models, observations of ground  
1164 shaking and observed damage from past earthquakes. The authors investigate if the  
1165 obtained scenarios are consistent with observations and the reason for the obtained  
1166 differences.

1167  
1168 The topic of the paper is very interesting and suitable for the readers of the journal. However,  
1169 the title and the redaction of the manuscript do not help to get this goal. The focus on  
1170 European Seismic Hazard and Risk Models distracts from the very interesting part of the  
1171 manuscript.

1172  
1173 The manuscript should be focused as a sensitivity study of the ground motion estimation and  
1174 damage estimation using different input models and how these are closest or not to the  
1175 observed data from Le Teil earthquake.

1176  
1177 Therefore, each section must be introduced with the models that are going to be compared,  
1178 why are those comparisons going to be done in that section?.

1179  
1180 Additionally, each comparison must be explained more in detail so the reader can see clearly  
1181 which models are kept constant and which are compared.

1182  
1183 Finally, the author must try to rewrite the conclusions according to the comparisons they are  
1184 doing. My final recommendation is to reconsider the publication of the manuscript after major  
1185 revisions.

1186  
1187 We thank the reviewer for their positive and constructive comments. We agree that the topic  
1188 of the paper should lean more towards the comparison of various components of the damage  
1189 estimation (rupture model, ground-motion model, exposure model, fragility model) instead of  
1190 sticking strictly to the ESHM20 and ESRM20 framework.

1191  
1192 We will clarify the nature and objective of the various comparisons by adding more details in  
1193 the Introduction (addition of a Figure explaining the structure of the paper) and new tables  
1194 detailing the various models and their assumptions (see our answers to Comment 1).

1195 We will also enrich the Conclusions section with an account of our findings.

1196 The answers to the reviewer's comments are detailed below.

### 1197 1198 1199 **REVIEWER 2 - MAIN COMMENTS**

1200  
1201 The concept ShakeMap analysis is not clear. The authors cite Wald et al. 2022, but they  
1202 should explain better.

1203  
1204 We will add a few lines to explain the concept of ShakeMap (objective, algorithm, observations  
1205 used, etc.). It should be noted that we have generated the shake-map ourselves, using our  
1206 specific configuration of the USGS ShakeMap software (version 4). The parameters related to  
1207 this shake-map are detailed in the last row of the following table that we propose to add (model  
1208 GM4):

1209  
1210

| GM Map ID | Type                | GMM                               | Site model                    | Rupture model | Observations     |
|-----------|---------------------|-----------------------------------|-------------------------------|---------------|------------------|
| GM1       | ground-motion field | KothaEtAl2020 Site                | BRGM soil classes to Vs30     | Ritz et al.   | No               |
| GM2       | ground-motion field | KothaEtAl2020 ESHM20Slope Geology | Slope & Geology (ESRM20 data) | Ritz et al.   | No               |
| GM3       | ground-motion field | KothaEtAl2020 Site                | ESRM20 Vs30 data              | Ritz et al.   | No               |
| GM4       | shake-map           | KothaEtAl2020 Site                | BRGM Soil class to Vs30       | Ritz et al.   | Seismic stations |

1211  
1212

1213 **Line 62.** When describing the earthquake, you have to indicate also the registered  
1214 magnitude and focal depth. Also, they indicate a estimated near-faults PGAs with a 68%  
1215 confidence interval of 0.3-1.9g . Is this a range in the rupture area? Which is the size of the  
1216 rupture? How can you explain such a high attenuation because the at 15 km the recorded  
1217 PGA was only 0.04 g (that is a reduction of 77% of the PGA in 15 km if compared with 0.3g).

1218

1219 We will modify the sentence in order to specify the magnitude and focal depth (however, keep  
1220 in mind that several models have proposed different depths and magnitudes):

1221 "The Le Teil earthquake took place on the 11th of November 2019, and its epicentre is located  
1222 at 44.518° N 4.671° E (Ritz et al., 2020), with a focal depth of 1 km and a magnitude Mw 4.9  
1223 (Ritz et al., 2020), in close proximity to the municipality of Le Teil and the town of Montélimar  
1224 in the Lower Rhône valley in France."

1225

1226 Causse et al. (2021) estimated a PGA with a 68 % confidence interval of 0.3-1.9 g in the fault  
1227 projection on ground surface.

1228

1229 In the scenario calculations we use ruptures, whose size is equal to the median rupture area  
1230 given by the Wells and Coppersmith (1994) scaling law. In the case of the rupture model  
1231 according to the parameters based on Ritz et al. (2020), the area of the rupture model is equal  
1232 to 6.49 km<sup>2</sup>. The revised manuscript will include these details.

1233

1234 The observed high attenuation of PGA is probably due to the very shallow rupture: the Le Teil  
1235 earthquake is a specific event, which generated very high large intensities right next to the  
1236 epicentre, however the ground motion attenuated very quickly.

1237

1238

1239 **Line 75.** Do not use number for macroseismic intensity, it is better to say VII-VIII instead 7-8

1240

1241 In line 81, we mention a decimal intensity of 7.5 (this was mentioned as is in the publication by  
1242 Schlupp et al., 2022). In order to remain faithful to that publication and to be consistent, we  
1243 propose to keep numbers to express macroseismic intensity. For the sake of consistency, we  
1244 will also use "intensity 7" instead of "intensity VII" in line 79.

1245

1246 The use of numbers instead of letters for macroseismic intensity has been advocated by  
1247 Musson et al. (2010).

1248

1249 Associated reference:

1250 Musson, R. M., Grünthal, G., & Stucchi, M. (2010). The comparison of macroseismic intensity  
1251 scales. *Journal of Seismology*, 14, 413-428.

1252

1253

1254 **Line 110.** Regarding the test based on the intensity of the seismic ground motion. The  
1255 authors compare the different scenarios pointing that the lowest PGA and Sa0.3s must be  
1256 due to differences in the rupture distance but they do not say anything about which scenarios  
1257 is closest to the observed ground motion. Which models fit better the observations?  
1258

1259 It is very difficult to compare the models with measured observations (i.e., recordings of seismic  
1260 stations), since such measures are very sparse (the nearest station is around 15km from the  
1261 epicentre). Therefore, in the absence of measures in the epicentral area, it is difficult to  
1262 compare the effects of different rupture distances in this area to measured ground-motions  
1263 (this is where the relative differences in rupture distance are the largest, as they are greatly  
1264 reduced further away from the epicentre). This is why we use macroseismic intensity (precise  
1265 estimates obtained from field surveys) for the comparison. We will add a couple of sentences  
1266 of explanations on this issue in the text.  
1267

1268  
1269 **Line 160.** Regarding the test based on the macroseismic intensity. I do not understand what  
1270 the authors are trying to demonstrate. If you are using correlations from Ground Motion to  
1271 Intensity the results that you are going to obtain should be similar to the obtained in the  
1272 previous section. If the idea is to see which is the best GMICEs for the region, then using  
1273 only those scenarios is not enough, the authors should look for the most recent correlation  
1274 (using a higher number of observations ground motions and macroseismic intensity) and  
1275 simply use that relationship with the corresponding standard deviation and probably the  
1276 observed intensity at Le Tail will be in that range.  
1277

1278 Thank you for this comment. The comparisons based on the macroseismic intensity serve  
1279 the purpose of selecting one rupture to use in subsequent comparison. This will be clarified  
1280 in the revised manuscript.  
1281

1282  
1283 **Line 209.** Estimation of damage using different risk analysis tools

1284 Here the authors compare the damage results using Armagedom and OpenQuake but  
1285 the section should be explained better. As far as I understand the damage obtained with  
1286 Armagedom is obtained using the ground motion modelled by the deterministic scenarios (all  
1287 of used in the previous sections?, one of them?) and the semi-empirical macroseismic  
1288 method, but regarding Openquake the authors indicate the use the ESHM20 ground motion  
1289 logic tree (is this meaning you are comparing damage using a deterministic scenarios with  
1290 damage from a probabilistic hazard map? It sounds strange to me. Can you clarify?  
1291

1292 For the estimation of damages, Armagedom uses a ground motion or a macroseismic intensity  
1293 map. This map can be modelled either for a deterministic scenario (magnitude, epicentre,  
1294 ground-motion models), by numerical simulation or by a probabilistic procedure (probabilistic  
1295 hazard map). The ground motion map can be derived by Armagedom or can be uploaded from  
1296 the output of other softwares (ShakeMap, OpenQuake hazard module, etc.). The acceleration  
1297 ground-motion map must then be converted to macroseismic intensity with a GMICE. In  
1298 addition, an observed macroseismic intensity map can also directly be used for damage  
1299 estimation with Armagedom.  
1300

1301 As you well understood, the intensity map is used with the RISK-UE semi-empirical  
1302 macroseismic method for damage calculation (hence the need for intensity map).  
1303

1304 The calculation with OpenQuake is not a classical PSHA. It is a scenario calculation, where  
1305 the rupture is deterministically defined, and the intensity of the ground motion is modelled using  
1306 the ESHM ground motion logic tree, which employs the GMPE «KothaEtAl2020ESHM20».  
1307  
1308

1309 Which is the method used in OPENQUAKE for the damage estimation is also the same used  
1310 in Armagedom? Is it a different method? You have explained how this is done to be sure that  
1311 you can compare the results.

1312  
1313 OpenQuake and Armagedom use different methods for the damage estimation.

1314  
1315 As mentioned previously, Armagedom uses the RISK-UE semi-empirical macroseismic  
1316 method. This is based on the intensity values and a vulnerability index for the calculation of  
1317 the mean damage degree for the beta distribution.

1318  
1319 OpenQuake uses ground motion intensities and fragility curves.

1320  
1321 The two methods are obviously different, but, no matter what their path, the results of both  
1322 methods have the same aim: asses the damages after an earthquake. Considering this same  
1323 objective, the results from the two methods can be compared.

1324  
1325 Nevertheless, we agree with your comment, and we will add a paragraph to summarise both  
1326 methods.

1327  
1328 A few articles attempt to address the issue (e.g. Lestuzzi et al. 2016).

1329 Lestuzzi, P., Podestà, S., Luchini, C. et al. Seismic vulnerability assessment at urban scale  
1330 for two typical Swiss cities using Risk-UE methodology. Nat Hazards 84, 249–269 (2016).  
1331 <https://doi.org/10.1007/s11069-016-2420-z>

1332  
1333  
1334 **Line 237.** Regarding the Damage based on observations. Again, this is rather difficult to  
1335 understand. The paragraph starts speaking about test related to vulnerability and risk  
1336 modelling, but the conclusion of the paragraph is simply a table assigning building  
1337 taxonomies to the building database. If the author wants to create different taxonomies to  
1338 their database, they should name the section: Vulnerability estimation or something related  
1339 to that.

1340  
1341 We understand the remark of the reviewer. Yes, the name of the Section is not adequate, and  
1342 this will be changed in the revised manuscript.

1343  
1344 We do not want to create different (new) taxonomies to our database, we just want to assign,  
1345 based on the structural information in the AFPS forms, the building in the existing taxonomies  
1346 (both RISKUE and ESRM20 building classes). The names of these two taxonomies are  
1347 different but there is a real physical correspondence between these two typologies, based on  
1348 the construction code, construction material, load-bearing resistant system, etc.).

1349  
1350  
1351 **Line 248.** Regarding Estimated damage based on a “building-by-building” Here the authors,  
1352 compare the building-by-building damage results using OPENQUAKE when using Ritz et al.  
1353 scenario and Shakemap analysis (try to find a better name for this). Initially those analysis  
1354 use the same Vs30 model and they also include a new Vs30 model (named ESHM20 Vs30)  
1355 to the Ritz et al. scenario. Again, this is very messy. If you want to compare the influence of  
1356 the ground motion scenario, it is clear the comparison between Ritz and Shakemap using the  
1357 same Vs30 model but if you want to compare the Vs30 influence you should also include the  
1358 Shakemap scenario with the ESHM20 Vs30 model to be consistent.

1359  
1360 We agree that our presentation of the various comparisons in the submitted manuscript is  
1361 unclear. We will revise the nomenclature and we will clarify the assumptions behind each  
1362 scenario, using a table like this:

1363

| GM Map ID | Type                | GMM                               | Site model                    | Rupture model | Observations     |
|-----------|---------------------|-----------------------------------|-------------------------------|---------------|------------------|
| GM1       | ground-motion field | KothaEtAl2020 Site                | BRGM soil classes to Vs30     | Ritz et al.   | No               |
| GM2       | ground-motion field | KothaEtAl2020 ESHM20Slope Geology | Slope & Geology (ESRM20 data) | Ritz et al.   | No               |
| GM3       | ground-motion field | KothaEtAl2020 Site                | ESRM20 Vs30 data              | Ritz et al.   | No               |
| GM4       | shake-map           | KothaEtAl2020 Site                | BRGM Soil class to Vs30       | Ritz et al.   | Seismic stations |

1364  
1365  
1366  
1367  
1368  
1369  
1370  
1371  
1372

**Line 287.** Regarding Estimated damage based on aggregated exposure model. Here the authors carry out many different comparisons. Again, it is very messy, and it is not clear why you are doing it and what are you looking for.

Again, we will take greater care of explaining these various comparisons. We propose to add the following table to summarize the different damage estimation models:

| Damage scenario ID | GM Map ID | Exposure model  |
|--------------------|-----------|-----------------|
| DS1                | GM1       | BRGM exposure   |
| DS2                | GM1       | ESRM20 exposure |
| DS3                | GM2       | BRGM exposure   |
| DS4                | GM2       | ESRM20 exposure |
| DS5                | GM3       | BRGM exposure   |
| DS6                | GM3       | ESRM20 exposure |
| DS7                | GM4       | BRGM exposure   |
| DS8                | GM4       | ESRM20 exposure |

1373  
1374  
1375  
1376

These damage scenarios can then be compared to the damage “observations” DD2 and DD3, as introduced in the following table:

| Observed Damage Data ID | Exposure resolution                           | Exposure data                           | Damage estimation method                                                                   | Damage conversion method                                                                                                                  |                   |
|-------------------------|-----------------------------------------------|-----------------------------------------|--------------------------------------------------------------------------------------------|-------------------------------------------------------------------------------------------------------------------------------------------|-------------------|
| DD1                     | Building-by-building (327 buildings)          | AFPS emergency survey                   | AFPS emergency observations on 327 buildings (Green / Yellow / Red tags)                   | Conversion to EMS-98 damage grades (Tab. 2.1)                                                                                             | Related to Fig. 4 |
| DD2                     | Infra-municipality districts (2778 buildings) | National statistics database (BRGM-CCR) | AFPS emergency observations on 327 buildings (Green / Yellow / Red tags) + “Extrapolation” | Conversion to EMS-98 damage grades with expert judgment (Tab. 3.6)                                                                        | Related to Fig. 5 |
| DD3                     | Infra-municipality districts (2778 buildings) | National statistics database (BRGM-CCR) | AFPS emergency observations on 327 buildings (Green/Yellow/Red tags) + “Extrapolation”     | Conversion to EMS-98 damage grades (Tab. 2.1) + Bias adjustment on total number of 2778 buildings (accounting for non-surveyed buildings) | Related to Fig. 5 |

1377  
1378  
1379  
1380

**Conclusions:** The first conclusion is that the FM2010 model is the best to estimate macroseismic intensity since it is closer to Schlupp et al. (2022). Is this the model used in



1381 your national seismic hazard maps or shakemaps to convert from ground motion to  
1382 macroseismic intensity? Is it only appropriate for the Le Teil region?

1383

1384 The national seismic hazard map is not based on the use of GMICE. In mainland France, the  
1385 "official" shake-map generated by BCSF uses the GMICE by Caprio et al. (2015). We will add  
1386 a sentence of discussion on this.

1387

1388

1389 Along the paper you have made multiple comparison, so it would be nice if the conclusions  
1390 also indicate the main conclusion about those comparisons. At the moment, 11 lines are  
1391 conclusions regarding the ground motion comparisons (sections 3.1 and 3.2) and 11 lines  
1392 are conclusions regarding the rest of comparisons (3.3.1 to 3.3.4).

1393

1394 We will add a paragraph of main conclusions in the Conclusions section. This comment is also  
1395 in line with a remark from Reviewer 1.

1396
